# Supplementary material
Source: PubMed Central journal article supplement (PMC1413625)

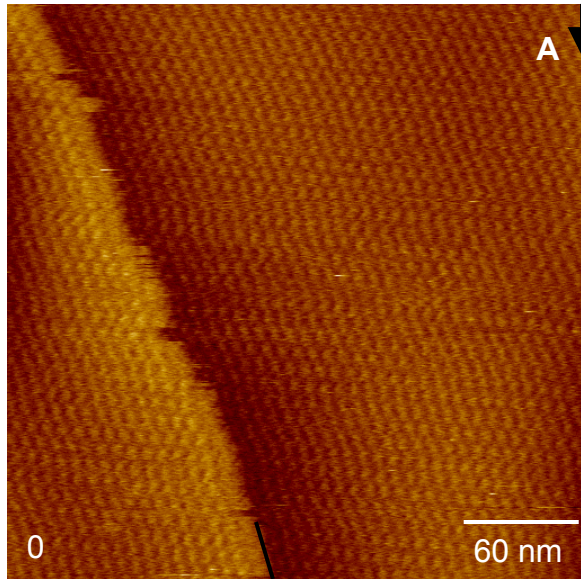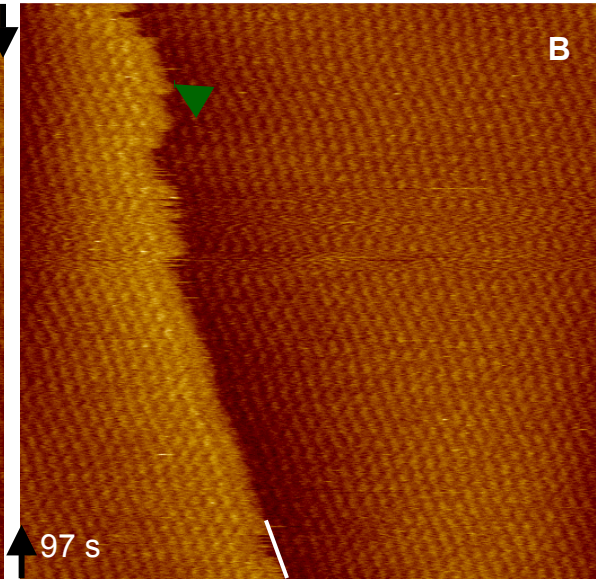

Supplement: pnas_0506526103_4.pdf [file pnas_0506526103_4.pdf]
